# Supplementary material for: Higher-order functional brain networks and anterior cingulate glutamate + glutamine (Glx) in antipsychotic-naïve first episode psychosis patients
Source: PubMed Central journal article supplement (PMC11006887; doi:10.1038/s41398-024-02854-7), 2024-04-10
Supplement: 41398_2024_2854_MOESM1_ESM.pdf [file 41398_2024_2854_MOESM1_ESM.pdf]

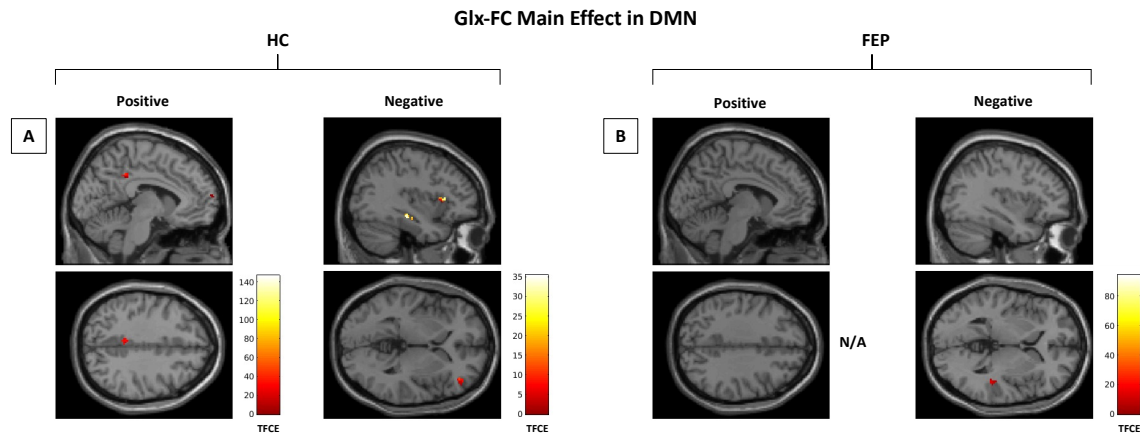

**Supplementary figure 1.** Clusters indicate correlations between positive/negative FC and Glx in A) HC and B) FEP in the DMN (TFCE corrected). DMN, default mode network; TFCE, threshold-free cluster enhancement; HC, healthy controls; FEP, first episode psychosis.

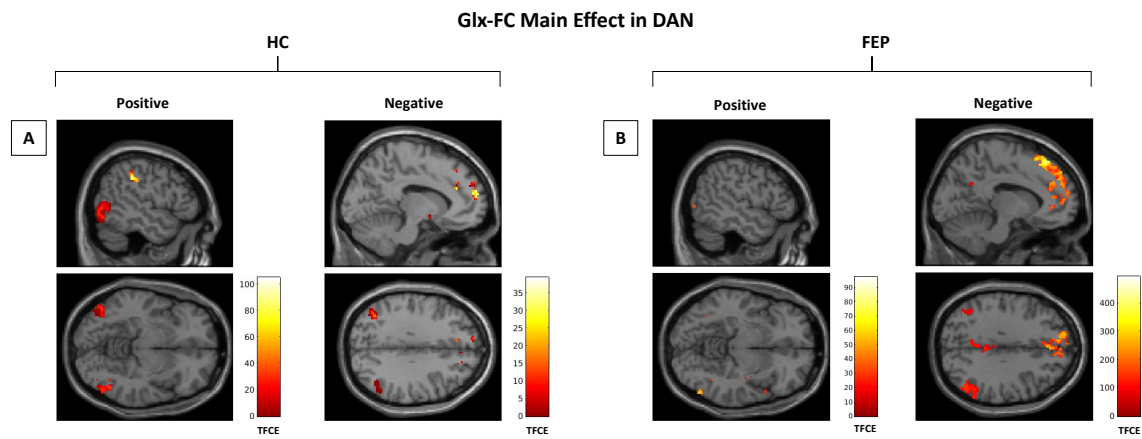

**Supplementary figure 2.** Clusters indicate correlations between positive/negative FC and Glx in A) HC and B) FEP in the DAN (TFCE corrected). DAN, dorsal attention network; TFCE, threshold-free cluster enhancement; HC, healthy controls; FEP, first episode psychosis.

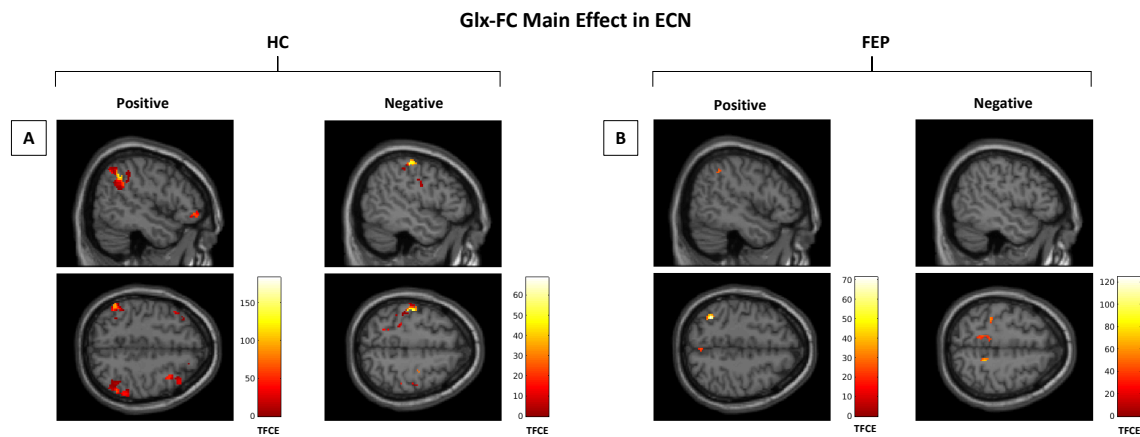

**Supplementary figure 3.** Clusters indicate correlations between positive/negative FC and Glx in A) HC and B) FEP in the ECN (TFCE corrected). ECN, executive control network; TFCE, threshold-free cluster enhancement; HC, healthy controls; FEP, first episode psychosis.
